# Supplementary material for: The Risk of Lymph Node Metastasis in Early Gastric Cancer Conforming to Indications of Endoscopic Resection and Pylorus-Preserving Gastrectomy: A Single-Center Retrospective Study
Source: Research Square preprint supplement (doi:10.21203/rs.3.rs-109492/v1), 2020-12-07
Supplement: Supplementary file 1 [file 69f015f87d895ad50aaa95a3.docx]

| Table-1 The distribution of LNM in each station in EGC according to tumor location. | | | |
| --- | --- | --- | --- |
| Station | Upper(n=6 cases) | Middle(n=28 cases) | Lower(n=31 cases) |
| No.1 | 1 | 3 | 4 |
| No.2 | 2 | 0 | 0 |
| No.3 | 2 | 8 | 7 |
| No.4 | 1 | 7 | 5 |
| No.5 | 0 | 5 | 6 |
| No.6 | 0 | 7 | 7 |
| No.7 | 1 | 3 | 6 |
| No.8  No.8a  No.8p | 0  0  0 | 1  1  0 | 4  4  0 |
| No.9 | 0 | 0 | 1 |
| No.10 | 0 | 0 | 1 |
| No.11  No.11p  No.11d | 1  1  0 | 1  0  1 | 0  0  0 |
| No.12 | 1 | 1 | 1 |

| Table-2: Univariable and multivariable analysis for LNM of EGC patients. | | | | |
| --- | --- | --- | --- | --- |
| Factor | Univariable Analysis | | Multivariable Analysis | |
| OR (CI 95%) | *P*-value | OR (CI 95%) | *P*-value |
| Age(years)  <40  ≥40 | 1  0.322(0.139-0.748) | 0.008 | NA | NA |
| Tumor size  <3cm  ≥3cm | 1  3.230(1.710-6.101) | <0.001 | 2.948 (1.480-5.872) | 0.002 |
| Depth of invasion  mucosal  Submucosa | 1  2.743(1.583-4.755) | <0.001 | NA | NA |
| Ulcer  Absent  Present | 1  0.687(0.400-1.180) | 0.173 | NA | NA |
| Differentiation  Well/Moderately  Poorly | 1  4.214(2.233-7.951) | <0.001 | 5.879(2.536-13.628) | 0.001 |
| LVI  Absent  Present | 1  8.576(2.993-24.568) | <0.001 | 14.569(2.493-85.135) | 0.001 |
| OR, Odds Ratio, CI, confidence interval, LVI, lymphovascular invasion. | | | | |

| Table-3 Univariate and multivariate analysis of prognostic factors for early gastric cancer patient | | | | |
| --- | --- | --- | --- | --- |
| Factor | Univariable Analysis | | Multivariable Analysis | |
| HR (CI 95%) | *P*-value | HR (CI 95%) | *P*-value |
| Age(years)  <40  ≥40 | 1  1.067(0.141-8.076) | 0.950 | NA | NA |
| Tumor size  <2cm  ≥2cm  <3cm  ≥3cm | 1  2.791(0.937-8.317)  1  1.593(0.438-5.792) | 0.065  0.480 | 3.473(1.372-8.791)  NA | 0.009  NA |
| Depth of invasion*  Mucosal  Submucosa | 1  1.178(0.426-3.259) | 0.753 | NA | NA |
| Differentiation  Well-- Moderately  Poorly | 1  1.425(0.531-3.828) | 0.482 | NA | NA |
| LVI  Absent  Present | 1  2.419(0.310-18.885) | 0.399 | NA | NA |
| LNM  Absent  Present | 1  3.512(1.307-9.438) | 0.013 | 4.895 (1.588-15.095) | 0.006 |
